# Supplementary material for: Diagnostic significance of dysregulated miRNAs in T-cell malignancies and their metabolic roles
Source: PubMed Central journal article supplement (PMC10448964; doi:10.3389/fonc.2023.1230273), 2023-08-10
Supplement: Table_1.pdf [file Table_1.pdf]

**Supplementary Table 1**  
**Studies concerning metabolic impact of diagnostic miRNAs of T-cell malignancies with brief methodology**

| <b>miRNA</b> | <b>Expression status in T-cell malignancy</b> | <b>Expression in study</b>                           | <b>Methodology used</b>                                                                                                                                                        | <b>Metabolic impact</b>                                                                       | <b>Consequence</b>                                                                 | <b>Reference study</b>                        |
|--------------|-----------------------------------------------|------------------------------------------------------|--------------------------------------------------------------------------------------------------------------------------------------------------------------------------------|-----------------------------------------------------------------------------------------------|------------------------------------------------------------------------------------|-----------------------------------------------|
| miR-16-5p    | Upregulated (T-ALL)                           | Overexpressed in <i>in vitro</i> cell culture system | Measuring extracellular acidification rate (ECAR, a measure of aerobic glycolysis), oxygen consumption rate (OCR), lactate production and colorimetric ATP assays              | Decrease glucose consumption, Decrease lactate production rate, Decreased ATP levels          | Sensitize resistant cells to Dox treatment<br>Increases Radiosensitivity           | (Zhao et al., 2020)<br>(F. Wang et al., 2019) |
| let-7e       | Downregulated (T-ALL)                         | Overexpressed in cell lines                          | Measuring Oxygen concentrations, lactate concentration (L-lactate) and Oil Red O staining                                                                                      | Inhibits Oxidative phosphorylation, adipogenesis and reduced lactate production               | Transcriptionally regulates mitochondrial genome (ND4 gene) and rewires metabolism | (Sharma et al., 2021)                         |
| miR-17-92    | Upregulated (T-ALL)                           | Overexpressed in cell lines                          | Measuring aerobic glycolysis (ECAR), Oxygen consumption rate (OCR), lactate quantification, measuring glutamine consumption and ammonia production                             | Increased aerobic glycolysis, glucose uptake and lactate production, increased glutaminolysis | miR-17-92 co-operates with Myc to increase tumor aggressiveness                    | (Izreig et al., 2016)                         |
| miR-99a-5p   | Upregulated (T-ALL)                           | Overexpressed in cell lines and patient tissues      | RT-PCR and western analysis for expressional analysis followed by colorimetric assays for glucose uptake and lactate production, ECAR assay for aerobic glycolysis assessment, | Decreased glucose consumption and lactate production                                          | Overexpression of miR-99a-5p induced apoptosis and inhibited glycolysis            | (G. Wang et al., 2022)                        |
| miR-125b     | Upregulated (T-ALL)                           | Overexpressed in cell lines                          | Expression study by RT-PCR. Overexpression in                                                                                                                                  | Supressed glucose                                                                             | MiR-125b inhibited HK2 involved in                                                 | (Hui et al., 2018)                            |

**Supplementary Table 1**  
**Studies concerning metabolic impact of diagnostic miRNAs of T-cell malignancies with brief methodology**

|          |                       |                                                                                  |                                                                                                                                                                                                                                                               |                                                                                   |                                                                  |                            |
|----------|-----------------------|----------------------------------------------------------------------------------|---------------------------------------------------------------------------------------------------------------------------------------------------------------------------------------------------------------------------------------------------------------|-----------------------------------------------------------------------------------|------------------------------------------------------------------|----------------------------|
|          |                       | and assessed in patient tissue samples                                           | cell line followed by quantification of glucose, lactate and apoptosis                                                                                                                                                                                        | consumption and lactate production                                                | glycolytic regulation and tumor progression                      |                            |
| miR-124  | Downregulated (T-ALL) | Overexpressed in cell lines and use of locked nucleic acid (LNAs) for inhibition | Impact of glycolysis assessed by inhibiting glycolysis by varied concentrations of 5-TG (5-thiogluconase) and evaluating rate of conversion of labelled glucose. Lactate quantification by colorimetric assay and evaluating cellular oxygen consumption rate | Decrease in glycolytic rate, Increase in Oxygen consumption,                      | Inhibited Warburg effect and inhibiting cancer growth.           | (Sun et al., 2012)         |
| miR-326  | Downregulated (T-ALL) | Ectopic expression in cells                                                      | Evaluation of apoptosis (caspase3/7 assay) and ATP levels upon ectopic expression was noted.                                                                                                                                                                  | Induction of apoptosis and reduction in metabolic activity                        | miR-326 targets PKM2 to drive metabolic change in cells          | (Kefas et al., 2010)       |
| miR-146a | Upregulated (AITL)    | Transient overexpression in primary tumor cells                                  | Transfecting primary cell with miRNA mimics and evaluating mRNA and protein expression of metabolic followed by metabolite analysis using gas chromatography mass spectrometry.                                                                               | Alteration in TCA cycle genes and upregulation of pentose phosphate pathway genes | Stimulated proliferation of renal cancer cells                   | (Bogusławska et al., 2019) |
| miR-34a  | Upregulated (AITL)    | Transient overexpression using miRNA                                             | Transfection of cells with miRNA mimics followed by evaluation of key metabolic genes and                                                                                                                                                                     | Reduced glucose uptake<br>Reduced lactate production                              | MiR-34a targets LDHA and modulates glycolytic pathway to promote | (R. Zhang et al., 2016)    |

**Supplementary Table 1**  
**Studies concerning metabolic impact of diagnostic miRNAs of T-cell malignancies with brief methodology**

|            |                      |                                                                    |                                                                                                                                                                                                                                                 |                                                                                                                                                                                                          |                                                                   |                         |
|------------|----------------------|--------------------------------------------------------------------|-------------------------------------------------------------------------------------------------------------------------------------------------------------------------------------------------------------------------------------------------|----------------------------------------------------------------------------------------------------------------------------------------------------------------------------------------------------------|-------------------------------------------------------------------|-------------------------|
|            |                      | mimics or inhibitors                                               | proteins using RT-PCR and Western blot analysis. Glucose and lactate quantification using colorimetric/fluorometric assay kits                                                                                                                  |                                                                                                                                                                                                          | tumor proliferation and invasion.                                 |                         |
| miR-30b-5p | Downregulated (AITL) | Overexpression and inhibition system using lentiviral constructs   | Monoclonal cell line establishment using lentiviral miRNA construct followed by free fatty acid treatment and evaluation of genes and proteins related to lipid metabolism by RT-PCR, western blot, triglyceride levels and Oil Red O staining. | Decrease in size and number of intracellular lipid droplets and triglycerides. Overexpressing cells showed increased and decreased expression of fatty acid oxidation and lipid synthesis related genes. | miR-30b-5p inhibit fat deposition and modulates lipid metabolism. | (Q. Zhang et al., 2020) |
| miR-145    | Overexpressed (AITL) | Transient expression or knockdown using miRNA mimics or inhibitors | Evaluation of metabolism related genes by Q-PCR in overexpressing cells followed by dual-luciferase assay and chromatic-immunoprecipitation to predict their targets                                                                            | miR-145 negatively associated with genes involved in metabolic reprogramming.                                                                                                                            | miR-145 influences aerobic glucolysis though MYC.                 | (Hu et al., 2023)       |
| miR-210-3p | Upregulated (ALCL)   | Transient overexpression in cells                                  | Evaluation of metabolism related genes and proteins by qPCR and western                                                                                                                                                                         | Enhanced glucose consumption,                                                                                                                                                                            | miR-210-3p contributes to warburg effect by                       | (Du et al., 2020)       |

**Supplementary Table 1**  
**Studies concerning metabolic impact of diagnostic miRNAs of T-cell malignancies with brief methodology**

|          |                              |                                                                  |                                                                                                                                                                                                                             |                                                                                                                         |                                                                                                |                                            |
|----------|------------------------------|------------------------------------------------------------------|-----------------------------------------------------------------------------------------------------------------------------------------------------------------------------------------------------------------------------|-------------------------------------------------------------------------------------------------------------------------|------------------------------------------------------------------------------------------------|--------------------------------------------|
|          |                              |                                                                  | blotting followed by glucose lactate assay                                                                                                                                                                                  | lactate production                                                                                                      | inducing aerobic glycolysis.                                                                   |                                            |
| let-7f   | Upregulated (PTCL-NOS-TBX21) | Exogenous expression using a transgene                           | Intracellular glucose uptake assay and lactate assay. Metabolite profiling using Liquid chromatography mass spectrometry                                                                                                    | Decreased glucose uptake and lactate production. Reduced production of many metabolites in threonine catabolism pathway | Supresses Warburg effect and growth in cancer cells                                            | (Ma et al., 2014; Shyh-Chang et al., 2013) |
| miR-181a | Upregulated (PTCL-NOS-TBX21) | Molecular study of cells and patient derived mitochondrial miRNA | Purification of mitomiR-181a-5p followed by evaluation of metabolism related gene and protein expression studies using RT-PCR/qPCR, western blotting, miRNA/mRNA immunoprecipitation assays and immunohistochemistry assays | Reduced mitochondrial cytochrome B, mitochondrial CO2 and mitochondrial membrane potential                              | miR-181a overexpression resulted in reprogramming of glucose metabolism enabling proliferation | (Zhuang et al., 2020)                      |

**Supplementary Table 1**  
**Studies concerning metabolic impact of diagnostic miRNAs of T-cell malignancies with brief methodology**

|         |                                              |                                          |                                                                                                                                                                                                                                                                      |                                                                                     |                                                                          |                    |
|---------|----------------------------------------------|------------------------------------------|----------------------------------------------------------------------------------------------------------------------------------------------------------------------------------------------------------------------------------------------------------------------|-------------------------------------------------------------------------------------|--------------------------------------------------------------------------|--------------------|
| miR-155 | Upregulated (CTCLs)<br>Downregulated (PTCLs) | miR-155 deficient mouse models and cells | Use of miR-155 deficient <i>in vitro</i> and <i>in vivo</i> systems and evaluation of metabolic gene and protein expression by PCR and western blotting. Target prediction done by luciferase reporter assays. OXPHOS measurements and metabolite profiling by LC-MS | Activation of glucose metabolism by increased glucose uptake and lactate production | miR-155 is a key regulator of glucose metabolism supporting tumor growth | (Kim et al., 2018) |
|---------|----------------------------------------------|------------------------------------------|----------------------------------------------------------------------------------------------------------------------------------------------------------------------------------------------------------------------------------------------------------------------|-------------------------------------------------------------------------------------|--------------------------------------------------------------------------|--------------------|
